# Supplementary material for: Phenolic Extract from Aralia nudicaulis L. Rhizomes Inhibits Cellular Oxidative Stresses
Source: MDPI journal article supplement (doi:10.3390/molecules26154458), 2021-07-23
Supplement: s1 [file s1]

Supplementary Material

# Phenolic Extract from *Aralia nudicaulis* L. Rhizomes Inhibits Cellular Oxidative Stresses

Quentin Lion <sup>1</sup>, Andre Pichette <sup>1,2</sup>, Mouadh Mihoub <sup>1</sup>, Vakhtang Mshvildadze <sup>1,2</sup> and Jean Legault <sup>1,2,\*</sup>

- <sup>1</sup> Laboratoire d'analyse et de séparation des essences végétales (LASEVE), Département des Sciences Fondamentales, Université du Québec à Chicoutimi, 555 Boulevard de l'Université, Chicoutimi, QC G7H 2B1, Canada; Quentin.lion@uliege.be (Q.L.); Andre\_Pichette@uqac.ca (A.P.); Mouadh.mihoub1@uqac.ca (M.M.); vakhtang\_mshvildadze@uqac.ca (V.M.)
- <sup>2</sup> Centre de Recherche sur la Boréale (CREB), Département des Sciences Fondamentales, Université du Québec à Chicoutimi, 555 Boulevard de l'Université, Chicoutimi, QC G7H 2B1, Canada
- \* Correspondence: Jean.Legault@uqac.ca; Tel.: +14-18-545-5011 (ext. 2334)

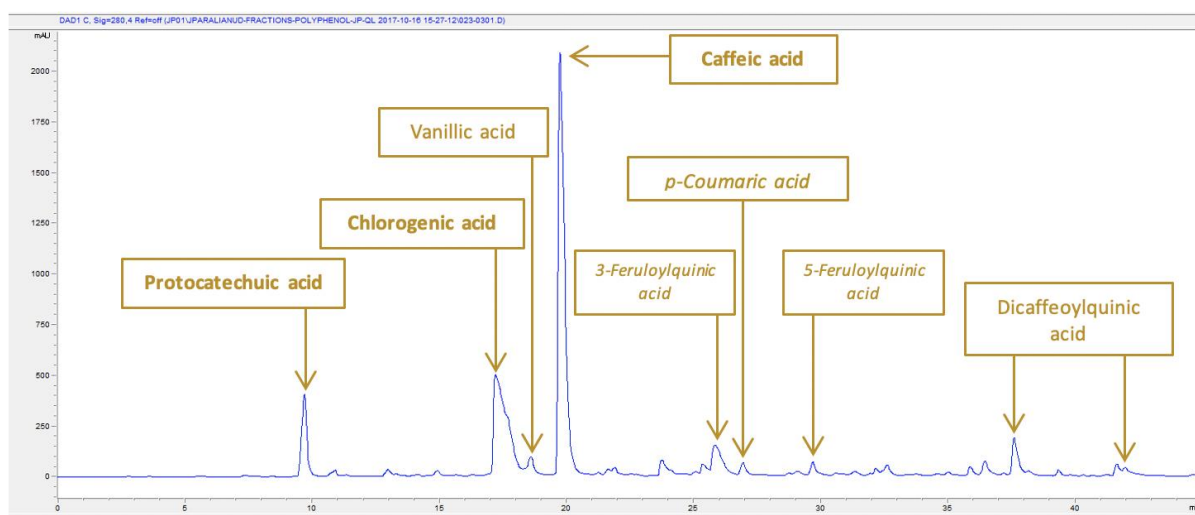

**Figure S1.** HPLC profiles of FEPC with composition identification.

**Table S1.** HPLC quantification of FEPC compounds.

|                            | FEPC ( $\mu\text{g}/\text{mg}$ ; $w/w\%$ ) |
|----------------------------|--------------------------------------------|
| <u>Protocatechuic acid</u> | $48 \pm 1$ ( <b>4.8%</b> )                 |
| <u>Chlorogenic acid</u>    | $156 \pm 1$ ( <b>15.6%</b> )               |
| Vanillic acid              | $10 \pm 1$ ( <b>1.0%</b> )                 |
| <u>Caffeic acid</u>        | $153 \pm 2$ ( <b>15.3%</b> )               |
| 3-Feruloylquinic acid      | $28 \pm 2$ ( <b>2.8%</b> )                 |
| p-Coumaric acid            | $4.7 \pm 1$ ( <b>0.47%</b> )               |
| 5-Feruloylquinic acid      | $4.8 \pm 1$ ( <b>0.48%</b> )               |
| Dicafeoylquinic acid       | $21 \pm 2$ ( <b>2.1%</b> )                 |
